# Supplementary material for: HERVH-derived lncRNAs negatively regulate chromatin targeting and remodeling mediated by CHD7
Source: Life Sci Alliance. 2021 Oct 18;5(1):e202101127. doi: 10.26508/lsa.202101127 (PMC8548210; doi:10.26508/lsa.202101127)
Supplement: Supplementary file 5 [file LSA-2021-01127_TableS4.xlsx]

## Sheet: List of guide RNAs and HR temp
Name	Sequence	Note
CHD7KO_guide-1 RNA	AGACGCGAGUCCGUUCCCAGGUUUUAGAGCUAUGCU	CHD7 null mutant
CHD7KO_ssODN	TGACACATTTTGATCACTATAATCAGTATGAACAACAAAAGATGCATCTGATGGATCAGCCGAACAGAATGATGAGCAACTAGCACTGGGAACGGACTCGCGTCTCCGCACTCGCAGTATCACACCCCTCCCGTTCCTCAGGTGCCCCATGGTGGCAGTGGTGGCGGT	CHD7 null mutant (introducing stop codon mutation)
CHD7-HA knockin gRNA	ACUUGAACUGGAACUGGUACGUUUUAGAGCUAUGCU	HA tagging to C-terminal end of CHD7
CHD7_HA knockin ssODN-2	CTTAGAAGACGAAATAGCACAGGGTGAAGAGCTAGACTCACTTGATGGCGGGGATGAAATAGAAAACAATGAAAATGATGAATACCCATACGATGTTCCAGATTACGCTTAACTAGTACCAGTTCCAGTTCAAGTGTTTAAAACTTTTGACAAGTGGTAGTCCTACTGTTTACACTCACAGTTAATGTTCATACCTAGTT	HA tagging to C-terminal end of CHD7
MEAF6P1 HERVH KO_5’ gRNA	UUAGAAGUAUACCGAACUCAGUUUUAGAGCUAUGCU	Specific HERVH element deletion
MEAF6P1 HERVH KO_3’ gRNA	CAGCAUCCAACGAUCACAGCGUUUUAGAGCUAUGCU	Specific HERVH element deletion
