# Supplementary material for: HERVH-derived lncRNAs negatively regulate chromatin targeting and remodeling mediated by CHD7
Source: Life Sci Alliance. 2021 Oct 18;5(1):e202101127. doi: 10.26508/lsa.202101127 (PMC8548210; doi:10.26508/lsa.202101127)
Supplement: Supplementary file 6 [file LSA-2021-01127_TableS5.xlsx]

## Sheet: List of LNA-GapmeRs
Name	Sequence	Note
SHHERVH_3	GGAAGATTTGGGACGA	Knockdown HERVH expression
SHHERVH_4	ATTGGGACCTAGCTCG	Knockdown HERVH expression
SHHERVH_12	ATGTGGAGTGGGTAGC	Knockdown HERVH expression
MALAT1	CGTTAACTAGGCTTTA	Knockdown MALAT1 expression
Negative control	GCTCCCTTCAATCCAA	LNA knockdown control
